# Supplementary material for: Chest X-Ray Findings in Drug Sensitive and Drug Resistant Pulmonary Tuberculosis Patients in Uganda
Source: Research Square preprint supplement (doi:10.21203/rs.3.rs-902393/v1), 2021-09-22
Supplement: Supplementary file 1 [file ccfba0c5c8b369e05ec9b825.docx]

**APPENDIX 1: Social Demographic and Clinical data**

Serial Number:

1. Sex:
2. Age:
3. Occupation:
4. GeneXpert results: RR negative RR positive
5. HIV serostatus: Positive Negative
6. CD4 count at time of diagnosis if #4 is positive:
7. History of smoking:
8. History of previous PTB treatment: Yes No
9. If #7 is yes, what was the treatment outcome: Defaulted treatment Cured treatment completed Treatment failure
10. Current TB treatment:
11. Clinical evidence of extrapulmonary tuberculosis: Yes No
12. If #10 is yes, what is the site:
13. Any current or past alcohol use:
14. History of diabetes: Yes No

# APPENDIX 2: Chest X-ray Reporting Form

| **Right Upper Zone Yes No Size**  Bronchopneumonic opacification  Consolidation  Cavities  Miliary opacification  Bronchiectasis  Atelectasis  Fibrotic bands  Bullae | **Left Upper Zone Yes No Size**  Bronchopneumonic opacification  Consolidation  Cavities  Miliary opacification  Bronchiectasis  Atelectasis  Fibrotic bands  Bullae |
| --- | --- |
| **Right Middle Zone Yes No Size**  Bronchopneumonic opacification  Consolidation  Cavities  Miliary opacification  Bronchiectasis  Atelectasis  Fibrotic bands  Bullae | **Left Middle Zone Yes No Size**  Bronchopneumonic opacification  Consolidation  Cavities  Miliary opacification  Bronchiectasis  Atelectasis  Fibrotic bands  Bullae |
| **Right Lower Zone Yes No Size**  Bronchopneumonic opacification  Consolidation  Cavities  Miliary opacification  Bronchiectasis  Atelectasis  Fibrotic bands  Bullae | **Left Lower Zone Yes No Size**  Bronchopneumonic opacification  Consolidation  Cavities  Miliary opacification  Bronchiectasis  Atelectasis  Fibrotic bands  Bullae |
| **Right Extra Pulmonary Yes No**  Lymphadenopathy  Pleural effusion  Empyema  Pleural fibrosis | **Left Extra Pulmonary Yes No**  Lymphadenopathy  Pleural effusion  Empyema  Pleural fibrosis |

Serial number:

Other finding: …………………………………………………………………………………………………………………………………………………………………………………………………………………………………………………………………………………………
